# Supplementary material for: Self-delivery of a metal-coordinated anti-angiogenic nanodrug with GSH depleting ability for synergistic chemo-phototherapy
Source: Royal Society of Chemistry journal article supplement (doi:10.1039/d3bm00994g), 2023-01-01
Supplement: d3bm00994g1.pdf [file d3bm00994g1.pdf]

## **Self-Delivery of Metal-Coordinated Anti-Angiogenic Nanodrug with GSH Depleting Ability for Synergistic Chemo-Phototherapy**

Fukai Zhu,<sup>a, b, c, d, f</sup> Cailin Huang,<sup>c, f</sup> YanLing Lin,<sup>c, f</sup> Yang Li<sup>c, f, \*</sup> Ruiqin Tu,<sup>d, e</sup>  
Weihong Lu,<sup>a, d, \*</sup>

<sup>a</sup> Department of Gynecology, Zhongshan Hospital (Xiamen), Fudan University, Xiamen, 361015, China.

<sup>b</sup> Engineering Technological Center of Mushroom Industry, Minnan Normal University, Zhangzhou, Fujian 363000, China.

<sup>c</sup> CAS Key Laboratory of Design and Assembly of Functional Nanostructures, Fujian Institute of Research on the Structure of Matter, Chinese Academy of Sciences, Fuzhou 350002, China.

<sup>d</sup> Xiamen Clinical Research Center for Cancer Therapy, Xiamen, 361015, China

<sup>e</sup> Department of Obstetrics and Gynecology, Zhongshan Hospital, Fudan University, Shanghai, 200032, China.

<sup>f</sup> Department of Translational Medicine & Xiamen Key Laboratory of Rare Earth Photoelectric Functional Materials, Xiamen Institute of Rare-Earth Materials, Haixi Institute, Chinese Academy of Sciences, Xiamen 361021, China.

\*Corresponding authors:

[li.yang@fjirsm.ac.cn](mailto:li.yang@fjirsm.ac.cn); [lu.weihong@zsmhospital.com](mailto:lu.weihong@zsmhospital.com)

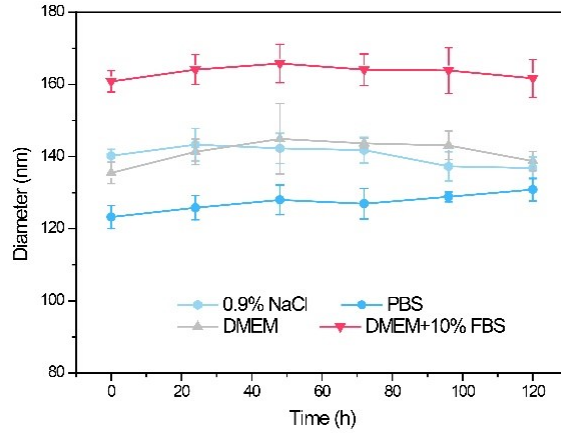

**Figure S1.** Physiological stability of ICCR dispersed in saline, PBS, DMEM and DMEM containing 10% serum.

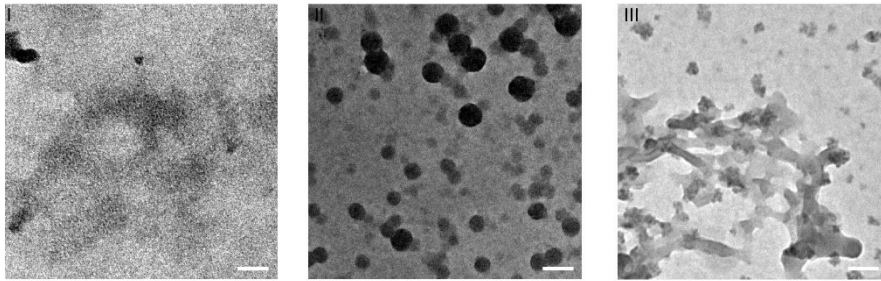

**Figure S2.** TEM images of ICC nanodrug treated with GSH (I, originated from Figure 2H), weak acidity (pH 6.5) (II), relatively strong acidity (pH 5.0) for 6 h.

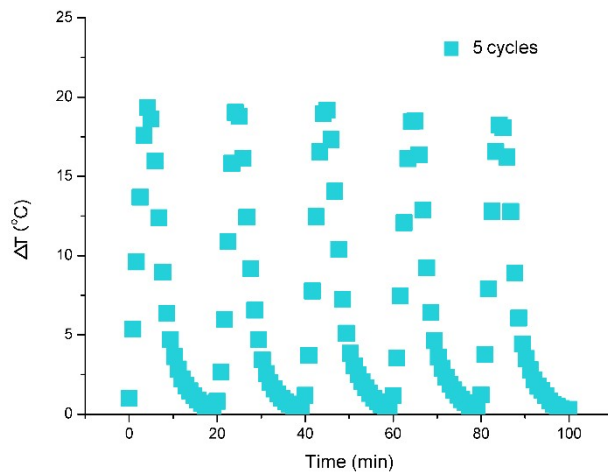

**Figure S3.** Temperature change of ICCR nanodrug with laser irradiation cycles.

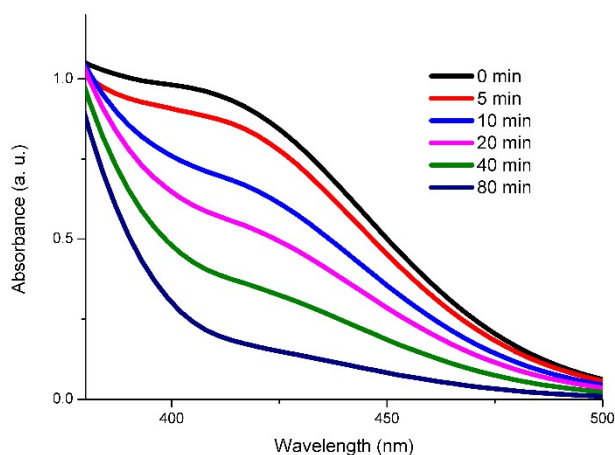

**Figure S4.** GSH consumption capacity of ICCR nanodrug determined by UV-vis spectra of Ellman's reagents (5, 5'-dithiobis-(2-nitrobenzoic acid) (DTNB) in GSH pre-incubated with ICCR.

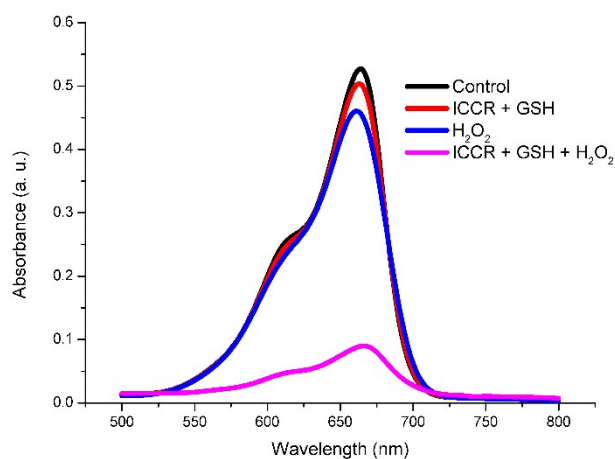

**Figure S5.** *In vitro* ROS generation ability of ICCR via methylene blue (MB) degradation assay.

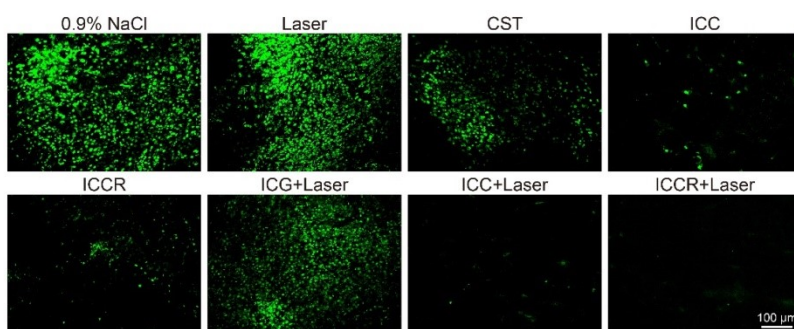

**Figure S6.** Immunofluorescent staining of different groups for vascular endothelial growth factor (VEGF).
